# Supplementary material
Source: PubMed Central journal article supplement (PMC6995012)
Supplement: pnas.1913827117.sapp.pdf [file pnas.1913827117.sapp.pdf]

## Supplementary Information Appendix

**A**

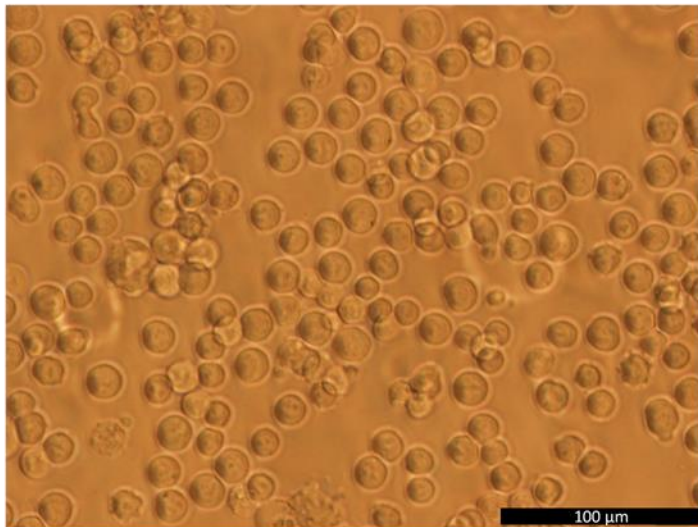

**B**

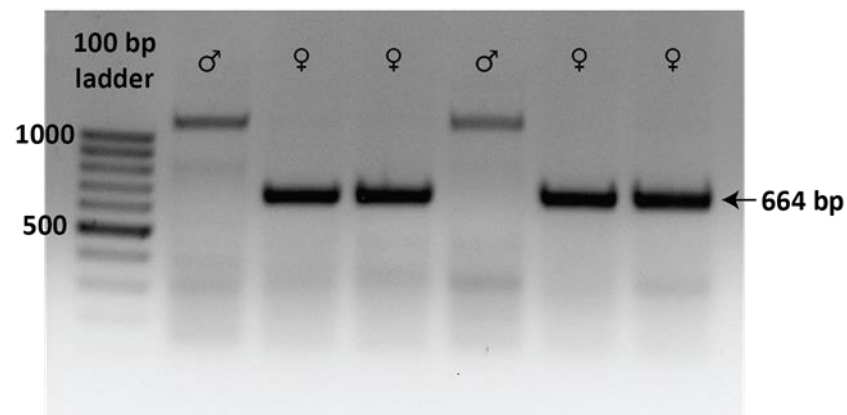

**Figure S1.** Derivation and sex determination of chicken PGCs. (A) Microscopic image of the PGC clone 13 showing the size, round shape, non-adherence, and low level of cell-to-cell clustering. (B) Detection of the W-chromosome-specific PCR product of 664 bp in several PGC lines derived in this study.

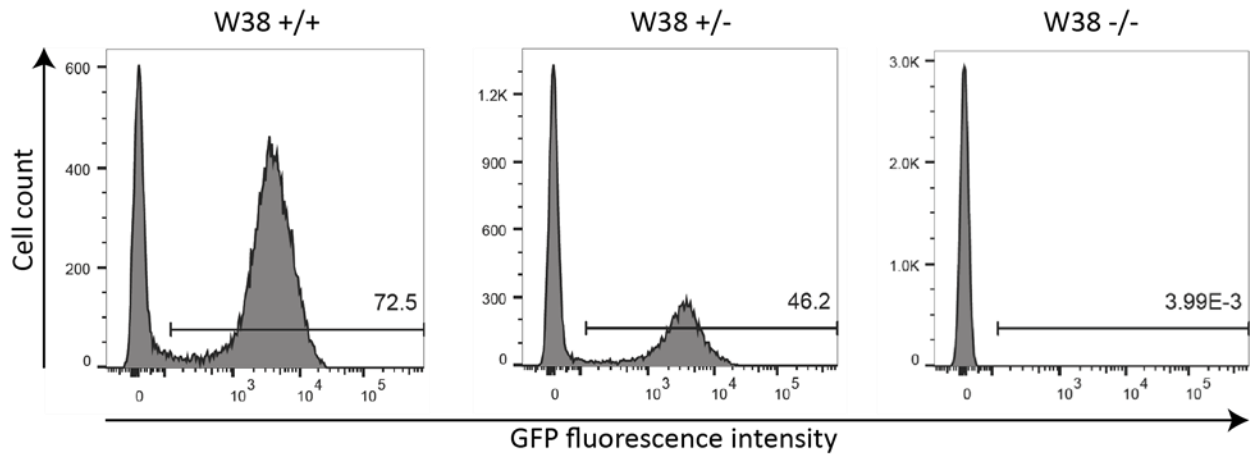

**Figure S2.** *In vitro* infection of fibroblasts derived from W38 +/+, W38 +/-, and W38 -/- embryos with GFP-transducing J subgroup-specific retrovirus RCASBP(J)GFP. Examples of FACS histograms of GFP-positive cells for each of W38 genotypes.

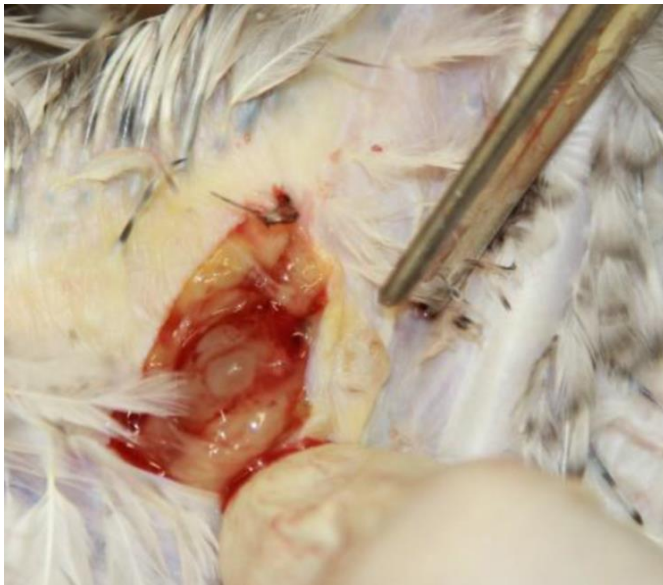

**Figure S3.** *In vivo* tumor induction by a transforming virus pseudotyped with J subgroup envelope. An example of the progressively growing tumor being dissected from the wing web of W38 +/+ chicken.

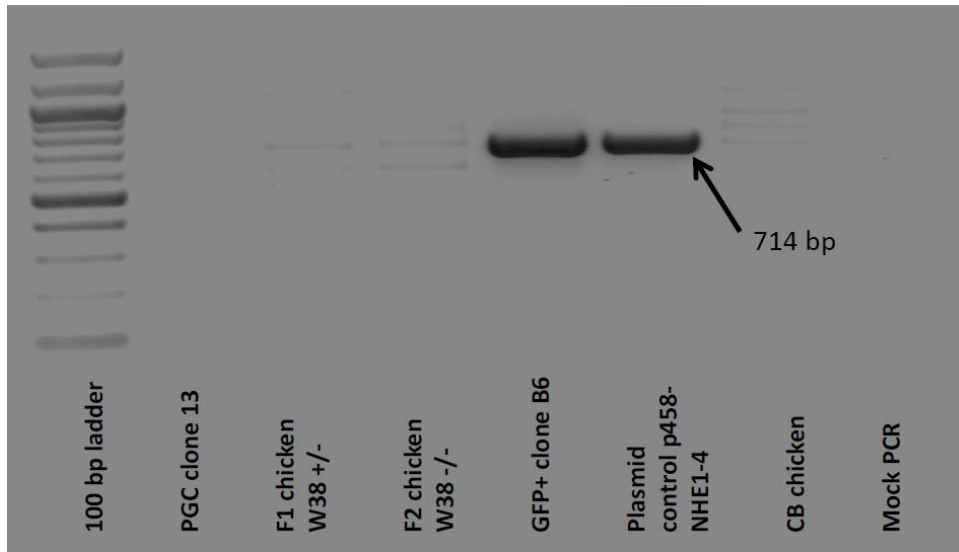

**Figure S4.** Amplification and detection of the GFP-specific PCR product of 714 bp in the CB PGC clone 13 (at the time of orthotopic transplantation), F<sub>1</sub> and F<sub>2</sub> chickens derived from the CB PGC clone 13 (genotypes W38 +/- and W38 -/-, respectively), Jurkat cell clone B6 contained single integrated copy of GFP gene per diploid genome, and plasmid control (p458-NHE1-4 CRISPR/Cas9 construct). Intact CB chicken and mock PCR were used as negative controls.

**Table S1.** Partial sequence of chNHE1 around the W38-encoding TGG triplet in PGC clones derived by CRISPR/Cas9-mediated homologous recombination.

|                             |                                                            |
|-----------------------------|------------------------------------------------------------|
| NHE1 wt                     | CGCGTGTCTCCGAGCCCACC <b>TGGG</b> AGCAGCCGTGGGGAGAGCCCAGGGG |
| ssODNΔW38                   | CGCGGGTCTCCGAGCCCACC---GAGCAGCCGTGGGGAGAGCCCAGGGG          |
| PGC clone 1                 | CGCGTGTCTCCGAGCCCACC---GAGCAGCCGTGGGGAGAGCCCAGGGG          |
| PGC clone 2                 | CGCGTGTCTCCGAGCCCACC---GAGCAGCCGTGGGGAGAGCCCAGGGG          |
| PGC clone 3 <sup>a</sup>    | CGCGGGTCTCCGAGCCCACC---GAGCAGCCGTGGGGAGAGCCCAGGGG          |
| PGC clone 4                 | CGCGGGTCTCCGAGCCCACC---GAGCAGCCGTGGGGAGAGCCCAGGGG          |
| PGC clone 5                 | CGCGKGTCTCCGAGCCCACC---GAGCAGCCGTGGGGAGAGCCCAGGGG          |
| PGC clone 6                 | CGCGKGTCTCCGAGCCCACC---GAGCAGCCGTGGGGAGAGCCCAGGGG          |
| PGC clone 7                 | CGCGKGTCTCCGAGCCCACC---GAGCAGCCGTGGGGAGAGCCCAGGGG          |
| PGC clone 8                 | CGCGKGTCTCCGAGCCCACC---GAGCAGCCGTGGGGAGAGCCCAGGGG          |
| PGC clone 9                 | CGCGGGTCTCCGAGCCCACC---GAGCAGCCGTGGGGAGAGCCCAGGGG          |
| PGC clone 10                | CGCGTGTCTCCGAGCCCACC---GAGCAGCCGTGGGGAGAGCCCAGGGG          |
| PGC clone 12                | CGCGGGTCTCCGAGCCCACC---GAGCAGCCGTGGGGAGAGCCCAGGGG          |
| PGC clone 13 <sup>a,b</sup> | CGCGGGTCTCCGAGCCCACC---GAGCAGCCGTGGGGAGAGCCCAGGGG          |
| PGC clone 14                | CGCGGGTCTCCGAGCCCACC---GAGCAGCCGTGGGGAGAGCCCAGGGG          |
| PGC clone 15                | CGCGGGTCTCCGAGCCCACC---GAGCAGCCGTGGGGAGAGCCCAGGGG          |
| PGC clone 16                | CGCGGGTCTCCGAGCCCACC---GAGCAGCCGTGGGGAGAGCCCAGGGG          |
| PGC clone 17                | CGCGTGTCTCCGAGCCCACC---GAGCAGCCGTGGGGAGAGCCCAGGGG          |
| PGC clone 18                | CGCGKGTCTCCGAGCCCACC---GAGCAGCCGTGGGGAGAGCCCAGGGG          |
| PGC clone 19                | CGCGGGTCTCCGAGCCCACC---GAGCAGCCGTGGGGAGAGCCCAGGGG          |
| PGC clone 20                | CGCGKGTCTCCGAGCCCACC---GAGCAGCCGTGGGGAGAGCCCAGGGG          |
| PGC clone 21                | CGCGGGTCTCCGAGCCCACC---GAGCAGCCGTGGGGAGAGCCCAGGGG          |
| PGC clone 25                | CGCGGGTCTCCGAGCCCACC---GAGCAGCCGTGGGGAGAGCCCAGGGG          |
| PGC clone 41                | CGCGGGTCTCCGAGCCCACC---GAGCAGCCGTGGGGAGAGCCCAGGGG          |
| PGC clone 42                | CGCGTGTCTCCGAGCCCACC-----GCCGTGGGGAGAGCCCAGGGG             |
| PGC clone 45                | CGCGTGTCTCCGAGCCCACC-----GGGG                              |
| PGC clone 46 <sup>a</sup>   | CGCGGGTCTCCGAGCCCACC---GAGCAGCCGTGGGGAGAGCCCAGGGG          |
| PGC clone 47 <sup>a,b</sup> | CGCGGGTCTCCGAGCCCACC---GAGCAGCCGTGGGGAGAGCCCAGGGG          |
| PGC clone 49                | CGCGGGTCTCCGAGCCCACC---GAGCAGCCGTGGGGAGAGCCCAGGGG          |
| PGC clone 50                | CGCGGGTCTCCGAGCCCACC---GAGCAGCCGTGGGGAGAGCCCAGGGG          |
| PGC clone 52                | CGCGTGTCTCCGAGCCCACC---GCAGCCGTGGGGAGAGCCCAGGGG            |
| PGC clone 53                | CGCGGGTCTCCGAGCCCACC---GAGCAGCCGTGGGGAGAGCCCAGGGG          |
| PGC clone 54                | CGCGGGTCTCCGAGCCCACC---GAGCAGCCGTGGGGAGAGCCCAGGGG          |
| PGC clone 55                | CGCGGGTCTCCGAGCCCACC---GAGCAGCCGTGGGGAGAGCCCAGGGG          |
| PGC clone 56                | CGCGGGTCTCCGAGCCCACC---GAGCAGCCGTGGGGAGAGCCCAGGGG          |
| PGC clone 59                | CGCGTGTCTCCGAGCCCACC--GGAGCAGCCGTGGGGAGAGCCCAGGGG          |

<sup>a</sup>Expanded PGC clones. <sup>b</sup>PGC clones used for orthotopic transplantation. Yellow background denotes the silent mutation T96G, K on the grey background denotes the T96G mutation in heterozygous state.

**Table S2.** Extensive data on the tumor induction in  $\Delta$ W38 chickens.

| Chicken No. | W38 genotype | Age of chicken at virus inoculation (days) | Tumor weight (g) 16 days p.i. |         |
|-------------|--------------|--------------------------------------------|-------------------------------|---------|
|             |              |                                            | 500 FFU                       | 250 FFU |
| 561         | -/-          | 56                                         | 0                             | 0       |
| 569         | -/-          | 34                                         | 0                             | 0       |
| 588         | -/-          | 20                                         | 0                             | 0       |
| 596         | -/-          | 13                                         | 0                             | 0       |
| 562         | +/-          | 48                                         | 1.5                           | 0.8     |
| 563         | +/-          | 48                                         | 8.7                           | 5.2     |
| 566         | +/-          | 40                                         | 4.8                           | 4.2     |
| 570         | +/-          | 34                                         | 9.3                           | 5.5     |
| 571         | +/-          | 34                                         | 12.3                          | 10.2    |
| 578         | +/-          | 27                                         | 5.4                           | 2.1     |
| 586         | +/-          | 20                                         | 8.2                           | 5.6     |
| 587         | +/-          | 20                                         | 15.6                          | 12.2    |
| 597         | +/-          | 13                                         | 32.1                          | 20.7    |
| 598         | +/-          | 13                                         | 21.3                          | 10.4    |
| 599         | +/-          | 13                                         | 16.8                          | 10.3    |
| 564         | +/+          | 48                                         | 27.4                          | 22.7    |
| 565         | +/+          | 48                                         | 7.4                           | 4.7     |
| 567         | +/+          | 40                                         | 12.8                          | 10.8    |
| 579         | +/+          | 27                                         | 11.5                          | 6.7     |
| 600         | +/+          | 13                                         | 12.7                          | 10.2    |

**Table S3.** List of oligonucleotide primers and ssODN used in this study<sup>a</sup>.

| Primer name                   | Primer sequence (5' to 3')                                                                                                                                             |
|-------------------------------|------------------------------------------------------------------------------------------------------------------------------------------------------------------------|
| W4 forward                    | GCACAGATGGAGACAAAAGC                                                                                                                                                   |
| W4 reverse                    | TTGGACACTTCAGGCTACAG                                                                                                                                                   |
| gRNA1                         | CACCGCCCCACGGCTGCTCCCAGGT                                                                                                                                              |
| gRNA2                         | AAACACCTGGGAGCAGCCGTGGGGC                                                                                                                                              |
| 3'cDNA synthesis primer       | AAGCAGTGGTATCAACGCAGAGTACT <sub>30</sub> VN <sup>b</sup>                                                                                                               |
| ECL1 forward                  | CGGCTCCCTCCGCCATG                                                                                                                                                      |
| ECL2 reverse                  | TCATCAGGCAGGCCAGCAGGAT                                                                                                                                                 |
| J subgroup <i>env</i> forward | CACTGATAAGGTTATTTGGGTACC                                                                                                                                               |
| J subgroup <i>env</i> reverse | GCACACAAGTATCATTTGAAAGAA                                                                                                                                               |
| ssODN $\Delta$ W38            | GCCCGCTGCTGCCCCGGCCAGCGCTTGCAGGCCGACGCCA<br>CGCGGGTCTCCGAGCCCACCGAGCAGCCGTGGGGAGAGC<br>CCGGGGGTATCACCGCCGCCCGCTGGCCACGGCCCAGG<br>AGGTGCACCCGCTGAACAAACAGCACCACAACCACTC |
| GFP-F                         | GTGAGCAAGGGCGAGGAG                                                                                                                                                     |
| GFP-R                         | CTTGTACAGCTCGTCCATGC                                                                                                                                                   |

<sup>a</sup>Oligonucleotides used for amplification of the potential off-target sites are given in SI Appendix (Table S4B).

<sup>b</sup>VN means the random sequence of V (ACG) and N (ACGT).

**Table S4.** Analysis of off-target mutations.

A. List of potential off-target sites with highest CFD score and core sequence of gRNA (at least 10 consecutive matched nucleotides close to protospacer adjacent motif). The mismatches between gRNA and off-target site are in bold, the core sequences are underlined, and the protospacer adjacent motifs are in italics.

| OFF-TARGET NUMBER | SEQUENCE                                                | CFD SCORE |
|-------------------|---------------------------------------------------------|-----------|
| NHE1              | CCCCACGGCTGCTCCCAGGT <i>GGG</i>                         | 1.00      |
| 1                 | <b>GCACA</b> <u>AGCTGCTCCCAGGT</u> <i>CGG</i>           | 0.73      |
| 2                 | <b>GCCCAT</b> <u>TCGT</u> <u>TGCTCCCAGGT</u> <i>GGG</i> | 0.51      |
| 3                 | <b>ATCCACT</b> <u>GCTGCTCCCAGGT</u> <i>AGG</i>          | 0.51      |
| 4                 | <b>TCCCCT</b> <u>GACTGCTCCCAGGT</u> <i>GGG</i>          | 0.46      |
| 5                 | <b>GCACAC</b> <u>GGCTGCTCCCAGGA</u> <i>GGG</i>          | 0.44      |
| 6                 | <b>CTCCAG</b> <u>GGAT</u> <u>TGCTCCCAGGT</u> <i>GGG</i> | 0.39      |
| 7                 | <b>CCTCAT</b> <u>TCGC</u> <u>AGCTCCCAGGT</u> <i>GGG</i> | 0.37      |
| 8                 | <b>TCCC</b> <u>CAGC</u> <u>CTGCTCCCAGGT</u> <i>AGG</i>  | 0.28      |

**B. Specification of potential off-target sites with the position of primers used for PCR amplification (underlined) and the sequence of gRNA complementary site (in bold)**

**OFF-TARGET 1**

mm4\_intergenic\_MVP|ENSGALT00000060508.1/ENSGALT00000062859.1\_chr28\_80996

mm4\_intergenic\_MVP|ENSGALT00000060508.1/ENSGALT00000062859.1\_chr28\_71655

mm4\_intergenic\_MVP|ENSGALT00000060508.1/ENSGALT00000062859.1\_chr28\_61901

mm4\_intergenic\_MVP|ENSGALT00000060508.1/ENSGALT00000062859.1\_chr28\_52071

GACACAGAAGAGCCTCCAGGCAGCAAGGGAGGGCCACACATGAAGCCCTTCCACAGCGGGACGTCAGGCTGCG  
ACTTCCACAGAGACCCGAGCACACCGCGGCAGCCGTCCCAACAGCGGCGCCAGCCTGG**GCACAAAGCTGCT**  
**CCAGGTCGGT**CCATCAGCAGAACCATAATCTCCACAGCCCCACCCTCAGTGTGCATAGGAACAGCCGTGTGCCA  
ATGACACCTGCTCAACTTGGTCAACATCAGCCAAGACAATAAATCCCACTCATTTACACCAGCTTCCGTTCCCTC  
GTCTTTTCCTG

1F GACACAGAAGAGCCTCCAGG

1R CAGGAAAAGACGAGGGGAAC

**OFF-TARGET 2**

mm4\_intergenic\_NCK2|C2orf40\_chr1\_135467756

CTGAGGGTGGTTAGCTGCTCCCATGCCATCGTTGCTCCAGGTGGGAATGACTACAGCTCTTTAACCAGAGTA  
TTTGTTCGATCAAACCTGGGCAGTAACTGTGTGCTGTCTTCAAAGTCATTCAAACCTGAATTAATGGAGTGCTCTTGT  
AAGCTGAAGCATGGGGAGGCAAGTAAATCCCTTTCCCAAGTCTCAGAGGAGCTGTTGTTTCCCTGCAGCATGCA  
GGGACTCACACGTGTCTAAAATGTCACATATCAGTCTCAGAGCCCACGCTGCTGTTCCAGGTAATACCTTGGTAAG  
CACACAGTTTTTGTCCCTCTCGACCTAGCAATGTGTGTGCCATGTCATCATCTCTCTTTTTGTTTTAATAGGGACT  
GGTTATGCCGCGCAGCATGACAATTAG

2F CTGAGGGTGGTTAGCTGCTC

2R CTAATTGTCATGCTGCCGGC

**OFF-TARGET 3**

mm3\_intron\_DIP2C\_chr2\_10160780

GCGAAGGCAGAAAACACGAGTAAGATTCAGAAAACCAACAAAAAAGTTGGAATTATGTTCCAAATGTGCTCCAGA  
CCCCTACCAGCTTTGTTGCCCTCTCTGAACGCACTCCATGGCCTCAATGTCTTTCTTGTAGTCCTTACACATCTGT  
GAAAACATACAT**CCACTGCTGCTCCAGGTAGG**ACAAAGGAGCGACAAAGCTCAGTCTCCCCAGGTCAGTCCACA  
CCCTATTTTCTGAGAACACTAAAAGTCAAATAAATCAATTCCTGCAATCCTAAGTGAGTTGTTTTGACCTAAGACT  
TATTGCAGTTTAAATGCCAACAAAACCAACCTTTTCTATTGCCGCTATAAATTCGGTGTCTGCTGCACCACCTCA  
GGACCTCAAC

3F GCGAAGGCAGAAAACACGAG

3R GTTGAGGTCTGAGGTGTGG



**OFF-TARGET 4**

mm4\_intron\_NDUFA10\_chr7\_6550501

CGTAGCCCTGTCCTTCCTTGCCCCAGCTTGTTCTGCTCCAGCTTCTTCTTTTCTGGTTCCTCCCCGAGGTTTTACC  
TCCCCAGAGAGGCTCTGCCACTCCTGGAAACCTCCTTAGTCACCTTTTTGCCTTCATACCTGAACAAGGTAA  
AACTGCTGGTGTACAAAATTCCACATGCTATAGTAACTTCATTTAATTACCTTTCCTGTTCTATTTGCTTTCACAAAT  
GAACCCTCACAAGGATTATGAGAAGATAGTGCTCTTCTTCTAAAGTTCTCATTTTAAAGGGTGTGAGGCAAACA  
GATGTTTTGGAATCAGGCAGTACCCCCAGCAC**CCACCTGGGAGCAGTCAGGGGA**AGTTTGCTGCAACAGCTGG  
TAGGACA

4F CGTAGCCCTGTCCTTCCTTG  
4R TGTCTACCAGCTGTTGCAG

**OFF-TARGET 5**

mm3\_intron\_CHRN2\_chr25\_1733917

AGGGATGTTACACCCACACCATGGGATCCCTGCCTGGCCACGTCCCCAGGAGCCCCCAGCCCCATATCTGACC  
CCTTCCCCATCAGCAC**CGGCTGCTCCAGGAGGG**CTGACCCACGCAGCCGCTGCCGCAGCACCGTGAGGCTGC  
AGATTTGAGGCAGCCTGGGATGGGACACAACCCAGCGTGGCTGAGCAGCGAGATGAGTTTCTGCACTCAGC  
AGAGGAGCTGCCAGGGCAGGGATGAGCCAGGGAGCCGCAGTGCTGAGGGTGCAGATCTGGGGCTCCGCAGGA  
TAAGAGGGCCAAGAGCTGAACCCCCCTGAGCTGACCAAACCCATCCCCGGCCCCACGCAGGTGAGCGAGGACTG  
GAAGTACGTGGCCATGGTCA

5F AGGGATGTTACACCCACAC  
5R TGACCATGGCCACGTACTTC

**OFF-TARGET 6**

mm3\_intergenic\_SLC2A1|ENSGALT00000066529.1/ENSGALT00000060478.1\_chr21\_6489988

CAATAGCCCCAAATTGCCGGCTCAGGCCAGGGCTTGTCCTCCTGTTGCAATACCCTGGCTCTGCTCTGGCATGCT  
GGGTGCAGTGGCCACGTCCCAGCTGGCCCACGATGCCGATCTGAGCTCCGTGTGGGGTTTGGGGCACAGAGA  
GCTCCTTCTATGCGAGGACCAGGAGGGTCCCTCCCTCCTGCAGCACCTCATCCCATCTCCACCT**CCAGGGATG**  
**CTCCAGGTGGG**TTCCCCCTCCTGGTTCCGACTGGGGTGGGAAGCACAGGCGACAGACACGTGTCTTTGCATAC  
TGACGGCTCAATCCATCCATCTGCTCATTGTTCTTGAGAGATGTAGGGCTGATTTCTTGTTGCCCGTGCCTCAGT  
TTCCCCACTCGCAGGACCCACCCAGCACTGCAGCCGAGCAGAGAACTCTGTGCTCCCT

6F CAATAGCCCCAAATTGCCGG  
6R AGGGGAGCACAGAGTTCTCT

**OFF-TARGET 7**

mm4\_intergenic\_IKZF3|ZPBP2\_chr27\_4696804

CAGACGTTTACCCGGACACAAAACGAGGGTTCCGTATTTCTCGTTTTCAATACCATCTACAGCTCAGAGCCCATT  
GCCCTCTCCATTGCGACCCCTCTGCGGTAGCACTGATGGAGCAGAAAGCACAGGAAGCGCCACAGCCCCTCTTC  
CACAGCCAAGGACAGACCTTGTGGCCCTTACAGGATCCGTTGGCACTGACACGGGTCCAATT**CCACCTGGGAGC**  
**TGCGATGAGG**ATCCCATGGGATGCTGGAGCCTGCAGAGCCCTGCAGCTGCAGGCTGGCTTCCGGGCTTACCCTC  
CTCACGCTGTACAGCCGTCCGCTTCTTCTCCTTCTCTTTCTCTTTTCTCTTTTTTTTTTTTTTTTTAAAC

AGATCTGAACATCTTTTCTCTGCTTTGCACACAACCCAGGAGCGGCTCCAGGAGGGACAGAGCCCATTCCCACTGG  
TTTGGT

7F CAGACGTTTACCCGGACACA

7R ACCAAACCAGTGGGAATGGG

**OFF-TARGET 8**

mm4\_intron\_DYM\_chrZ\_1166318

GGCCAAACACTGTGCAAGAGCAGGACATGTCGATCTGACCTGCTGATCAAGGGCCAGATTAACCAAAAATTCTG  
AAATTAATAATGTGCAAAAGTGATGAAATTAGAATTTGCCAACCGCTTCATTAATTTCTTAACGTTGGCAATAATG  
AGACGTAATTGCTGGCTCGAAACTCCCCAGCCTGCTCCAGGTAGGAAGATGAATGTGTCCCTCCCCTACTGTGGTT  
TGCACTGATCGTTCTGGTTTTCTGCTTCTTTGTCCCTTTGATGTTCAGGTGCTTTTGGGCAGCCCTGTAGCATCCA  
GCTTCCTGTGCAGCAGTGGGGCAGTTGGTGCAGCCAAGGTAACCAAATCAAAGGAATTTCTTAGGGAGAAAGAC  
AGGGAAAAATGGTCAGGTTGCTGCAGAAA

8F GGCCAAACACTGTGCAAGAG

8R TTTCTGCAGCAACCTGACCA

**C. Alignments of the potential off-target site sequences of the CB inbred chicken line, the W38 -/- PGC clone 13, and NCBI chicken genome. Sequencing primers (either forward or reverse) are highlighted with green color, the gRNA complementary sequence with red color.**

**OFF-TARGET 1**

```

NCBI chicken   GACACAGAAGAGCCTCCAGG CAGCAAGGGAGGGCCACACATGAAGCCCTTCCACAGCGG
CB             -----TTCCACAGCGG
PGC clone 13   -----TTCCACAGCGG
                *****

NCBI chicken   GACGTCAGGCTGCGACTTCCCACAGAGACCCGAGCACACCCGGCAGCCGGTCCCAACAG
CB             GACGTCAGGCTGCGACTTCCCACAGAGACCCGAGCACACCCGGCAGCCGGTCCCAACAG
PGC clone 13   GACGTCAGGCTGCGACTTCCCACAGAGACCCGAGCACACCCGGCAGCCGGTCCCAACAG
                *****

NCBI chicken   CGGCGGCCAGCCTGGG GCACAAAGCTGCTCCCAGGTCGGTCCATCAGCAGAACCATAATCT
CB             CGGCGGCCAGCCTGGGCACAAAGCTGCTCCCAGGTCGGTCCATCAGCAGAACCATAATCT
PGC clone 13   CGGCGGCCAGCCTGGGCACAAAGCTGCTCCCAGGTCGGTCCATCAGCAGAACCATAATCT
                *****

NCBI chicken   CCACAGCCCGACCCTCAGTGTGCATAGGAACAGCCGTGTGCCAATGACACCTGCTCAACT
CB             CCACAGCCCGACCCTCAGTGTGCATAGGAACAGCCGTGTGCCAATGACACCTGCTCAACT
PGC clone 13   CCACAGCCCGACCCTCAGTGTGCATAGGAACAGCCGTGTGCCAATGACACCTGCTCAACT
                *****

NCBI chicken   TGGTCAACATCAGCCAAGACAATAAATCCCACACTCATTTACACCAGCTTCGTTCCCTC
CB             TGGTCAACATCAGCCAAGACAATAAATCCCACACTCATTTACACCAGCTTC-----
PGC clone 13   TGGTCAACATCAGCCAAGACAATAAATCCCACACTCATTTACACCAGCTTC-----
                *****

NCBI chicken   GTCTTTTCCTG
CB             -----
PGC clone 13   -----

```

**OFF-TARGET 2**

```

NCBI chicken   CTGAGGGTGGTTAGCTGCTCCCAT GCCCATCGTTGCTCCCAGGTGGCAATGACTACAGC
CB             -----CCCATGCCATCGTTGCTCCCAGGTGGGAATGACTACAGC
PGC clone 13   -----CCCATGCCATCGTTGCTCCCAGGTGGGAATGACTACAGC
                *****

NCBI chicken   TCTTTTAACCAGAGTATTTGTTTCGATCAAACCTGGGCAGTAACTGTGTGCTGTCTTCAAAG
CB             TCTTTTAACCAGAGTATTTGTTTCGATCAAACCTGGGCAGTAACTGTGTGCTGTCTTCAAAG
PGC clone 13   TCTTTTAACCAGAGTATTTGTTTCGATCAAACCTGGGCAGTAACTGTGTGCTGTCTTCAAAG
                *****

NCBI chicken   TCATTCAAACCTGAATTAATGGAGTGTCTTGTAAGCTGAAGCATGGGGAGGCAAGTAAA
CB             TCATTCAAACCTGAATTAATGGAGTGTCTTGTAAGCTGAAGCATGGGGAGGCAAGTAAA
PGC clone 13   TCATTCAAACCTGAATTAATGGAGTGTCTTGTAAGCTGAAGCATGGGGAGGCAAGTAAA
                *****

NCBI chicken   TCCCTTTCCCAAGTCTCAGAGGAGCTGTTGTTTCCCTGCAGCATGCAGGGACTCACACG
CB             TCCCTTTCCCAAGTCTCAGAGGAGCTGTTGTTTCCCTGCAGCATGCAGGGAGTCAACG

```

```

PGC clone 13      TCCCTTTCCCAAGTCTCAGAGGAGCTGTGTTCCCTGCAGCATGCAGGGAGTCACAG
*****
NCBI chicken     TGTCTAAAAATGTCACATATCAGTCTCAGAGCCCACGCTGCTGTTTCAGGTAATACCCTTGG
CB               TGTCTAAAAATGTCACATATCAGTCTCAGAGCCCACGCTGCTGTTTCAGGTAATACCCTTGG
PGC clone 13     TGTCTAAAAATGTCACATATCAGTCTCAGAGCCCACGCTGCTGTTTCAGGTAATACCCTTGG
*****
NCBI chicken     TAAGCACACAGTTTTTGTCCCTCTCGACCTAGCAATGTGTGTGCCATGTCATCATCATCT
CB               TAAGCACACAGTTTTTGTCCCTCTCGACCTAGCAATGTGTGTGCCATGTCATCATCATCT
PGC clone 13     TAAGCACACAGTTTTTGTCCCTCTCGACCTAGCAATGTGTGTGCCATGTCATCATCATCT
*****
NCBI chicken     CCTTTTTGTTTTAATAGGACTGGGTATGCCGGCAGCATGACAATTAG
CB               -----
PGC clone 13     -----

```

**OFF-TARGET 3**

```

NCBI chicken     GCGAAGGCAGAAAACACGAGTAAGATTAGAAAACCAACAAAAAGTTGGAATTATGTTG
CB               -----AAAAGTTGGAATTATGTTG
PGC clone 13     -----AAAAGTTGGAATTATGTTG
*****

NCBI chicken     CAAATGTGCTCCAGACCCCTCACCAGCTTTGTTGCCCTCTCTGAACGCACTCCATGGCC
CB               CAAATGTGCTCCAGACCCCTCACCAGCTTTGTTGCCCTCTCTGAACGCACTCCATGGCC
PGC clone 13     CAAATGTGCTCCAGACCCCTCACCAGCTTTGTTGCCCTCTCTGAACGCACTCCATGGCC
*****

NCBI chicken     TCAATGTCTTTCTTGTAGTCCTTACACATCTGTGAAAACATACATCCACTGCTGCTCCCA
CB               TCAATGTCTTTCTTGTAGTCCTTACACATCTGTGAAAACATACATCCACTGCTGCTCCCA
PGC clone 13     TCAATGTCTTTCTTGTAGTCCTTACACATCTGTGAAAACATACATCCACTGCTGCTCCCA
*****

NCBI chicken     GCTAGGACAAAGGAGCGACAAAGCTCAGTCTCCCAGGTCAGTCCACACCCTATTTTCTG
CB               GGTAGGACAAAGGAGCGACAAAGCTCAGTCTCCCAGGTCAGTCCACACCCTATTTTCTG
PGC clone 13     GGTAGGACAAAGGAGCGACAAAGCTCAGTCTCCCAGGTCAGTCCACACCCTATTTTCTG
*****

NCBI chicken     AGAACACTAAAAGTCAAAATAAATCAATTCCTGCAATCCTAAGTGAGTTGTTTTGACCTA
CB               AGAACACTAAAAGTCAAAATAAATCAATTCCTGCAATCCTAAGTGAGTTGTTTTGACCTA
PGC clone 13     AGAACACTAAAAGTCAAAATAAATCAATTCCTGCAATCCTAAGTGAGTTGTTTTGACCTA
*****

NCBI chicken     AGACTTATTGCAGTTTAAATGCCAACAAAACCAACCTTTTCTATTGCCGCTATAAATTCC
CB               AGACTTATTGCAGTTTAAATGCCAACAAAACCAACCTTTTCTATTGCCGCTATAGATTCC
PGC clone 13     AGACTTATTGCAGTTTAAATGCCAACAAAACCAACCTTTTCTATTGCCGCTATAGATTCC
*****

NCBI chicken     GTGTCTGCTGCACCACACCTCAGGACCTCAAC
CB               GGGTCTGCTGC-----
PGC clone 13     GGGTCTGCTGC-----
* *****

```

**OFF-TARGET 4**

```

NCBI chicken     CGTAGCCCTGTCCTTCCTTGCCCCCAGCTTGTTCCCTGCTCCAGCTTCTTCCTTTTCTGGT
CB               -----TTTTCTGGT
PGC clone 13     -----TTTTCTGGT
*****

```

|                                    |                                                                                                                                                                                                               |
|------------------------------------|---------------------------------------------------------------------------------------------------------------------------------------------------------------------------------------------------------------|
| NCBI chicken<br>CB<br>PGC clone 13 | TCCTCCCCGAGGTTTTACCTCCCCCAGAGAGGCTCTGCCACTCCTGGAAACCTCCTCTTA<br>TCCTCCCCGAGGTTTTACCTCCCCCAGAGAGGCTCTGCCACTCCTGGAAACCTCCTCTTA<br>TCCTCCCCGAGGTTTTACCTCCCCCAGAGAGGCTCTGCCACTCCTGGAAACCTCCTCTTA<br>*****         |
| NCBI chicken<br>CB<br>PGC clone 13 | GTCACCTCTTTTTGCCTTCATACCTGAACAAGGTAAAAGTCTGGTGTACAAAATTCCA<br>GGCACCTCTTTTTGCCTTCATATCTGAACAAGGTAAAAGTCTGGTGTACAAAATTCCA<br>GGCACCTCTTTTTGCCTTCATATCTGAACAAGGTAAAAGTCTGGTGTACAAAATTCCA<br>* *****             |
| NCBI chicken<br>CB<br>PGC clone 13 | CATGCTATAGTAACTTCATTTAATTACCTTTCCTGTTCTATTTGCTTTCACAAATGAACC<br>CATGCTATAGTAACTTCATTTAATTACCTTTCCTGTTCTATTTGCTTTCACAAATGAACC<br>CATGCTATAGTAACTTCATTTAATTACCTTTCCTGTTCTATTTGCTTTCACAAATGAACC<br>*****         |
| NCBI chicken<br>CB<br>PGC clone 13 | CTCACAAGGATTATGAGAAGATAGTGCCTTCTTCCCTAAAGTTCTCATTTTAAAGGGTGC<br>CTCACAAGGATTATGAGAAGATAGCGCTCTTCTTCCCTAAAGTTCTCATTTTAAAGGGTGC<br>CTCACAAGGATTATGAGAAGATAGCGCTCTTCTTCCCTAAAGTTCTCATTTTAAAGGGTGC<br>*****       |
| NCBI chicken<br>CB<br>PGC clone 13 | TGAGGCCAAACAGATGGTTTGAATCAGGCAGTACCCCCAGCAC <b>CCCACCTGGGAGCAGTC</b><br>TGAGGCCAAACAGATGGTTTGAATCAGGCAGTACCCCCAGCACCCCACCTGGGAGCAGTC<br>TGAGGCCAAACAGATGGTTTGAATCAGGCAGTACCCCCAGCACCCCACCTGGGAGCAGTC<br>***** |
| NCBI chicken<br>CB<br>PGC clone 13 | <b>AGGGGA</b> AGTTTGCTGCAACAGCTGGTAGGACA<br>AGGGGAAGTTG-----<br>AGGGGAAGTTG-----<br>*****                                                                                                                     |

**OFF-TARGET 5**

|                                    |                                                                                                                                                                                                             |
|------------------------------------|-------------------------------------------------------------------------------------------------------------------------------------------------------------------------------------------------------------|
| NCBI chicken<br>CB<br>PGC clone 13 | AGGGATGTTACACCCACACCATGGGATCCCTGCCTGGCCACGTCCCCAGGAGCCCCCCC<br>-----CATGGGGTCCCTGCCTGGCCATGTCCCCAGGAGCCCCCCC<br>-----CATGGGGTCCCTGCCTGGCCATGTCCCCAGGAGCCCCCCC<br>*****                                      |
| NCBI chicken<br>CB<br>PGC clone 13 | AGCCCCATATCTGACCCCTTCCCCATCA <b>SCACACGGCTGCTCCCAGGAGGCC</b> TGACCCA<br>AGCCCCATATCTGACCCCTTCCCCATCAGCACACGGCTGCTCCCAGGAGGGCTGACCCA<br>AGCCCCATATCTGACCCCTTCCCCATCAGCACACGGCTGCTCCCAGGAGGGCTGACCCA<br>***** |
| NCBI chicken<br>CB<br>PGC clone 13 | CGCAGCCGCTGCCGCAGCACCGTGAGGCTGCAGATTTGAGGCAGCCTGGGATGGGGACAC<br>CGCAGCCGCTGCCGCAGCACCGTGAGGCTGCAGATTTGAGGCAGCCTGGGATGGGGACAC<br>CGCAGCCGCTGCCGCAGCACCGTGAGGCTGCAGATTTGAGGCAGCCTGGGATGGGGACAC<br>*****       |
| NCBI chicken<br>CB<br>PGC clone 13 | AACCCAGCGTGGCTGAGCAGCGAGATGAGTTTCTGCACTCAGCAGAGGAGCTGCCAGG<br>AACCCAGCGTGGCTGAGCAGCGAGATGAGTTTCTGCACTCAGCAGAGGAGCTGCCAGG<br>AACCCAGCGTGGCTGAGCAGCGAGATGAGTTTCTGCACTCAGCAGAGGAGCTGCCAGG<br>*****             |
| NCBI chicken<br>CB<br>PGC clone 13 | GCAGGGATGAGCCAGGGAGCCGAGTGCTGAGGGTGCAGATCTGGGGCTCCGCAGGATA<br>GCAGGGATGAGCCAGGGAGCCGAGTGCTGAGGGTGCAGATCTGGGGCTCCGCAGGATA<br>GCAGGGATGAGCCAGGGAGCCGAGTGCTGAGGGTGCAGATCTGGGGCTCCGCAGGATA<br>*****             |
| NCBI chicken<br>CB                 | AGAGGGCCAAGAGCTGAACCCCTGAGCTGACCAAACCCATCCCCGGCCCCACGCAGGT<br>AGAGGGCCAAGAGCTGAACCCCTGAGCTGACCAAACCCATCCCCG-----                                                                                            |

PGC clone 13 AGAGGGCCAAGAGCTGAACCCCTGAGCTGACCAAACCCATCCCCG-----  
\*\*\*\*\*

NCBI chicken GAGCGAGGACTG **GAAGTACGTGGCCATGGTCA**  
CB -----  
PGC clone 13 -----

**OFF-TARGET 6**

NCBI chicken **CAATAGCCCCAAATTGCCGG**CTCAGGCCAGGGCTTGTCCCTCCTGTTGCAATACCCTGGC  
CB -----TTGCAATACCTTGGC  
PGC clone 13 -----TTGCAATACCTTGGC  
\*\*\*\*\*

NCBI chicken TCTGCTCTGGCATGCTGGGTGCAGTGGCCACGTCCCAGCTGGCCACGATGTCCCATCT  
CB TCTGCTCTGGCATGCTGGGTGCAGTGGCCACGTCCCAGCTGGCCACGATGTCCCATCT  
PGC clone 13 TCTGCTCTGGCATGCTGGGTGCAGTGGCCACGTCCCAGCTGGCCACGATGTCCCATCT  
\*\*\*\*\*

NCBI chicken GAGCTCCGTGTGGGGTTTGGGGCACAGAGAGCTCCTTTCTATGCGAGGACCAGGAGGGT  
CB GAGCTCCGTGTGGGGTTTGGGGCACAGAGAGCTCCTTTCTATGCGAGGACCAGGAGGGT  
PGC clone 13 GAGCTCCGTGTGGGGTTTGGGGCACAGAGAGCTCCTTTCTATGCGAGGACCAGGAGGGT  
\*\*\*\*\*

NCBI chicken CCCTCCCTCCTGCAGCACCTCATCCCCATCTCCAC **CTCCAGGGATGCTCCCAGGTGGGT**  
CB CCCTCCCTCCTGCAGCACCTCGTCCCCATCTCCACCTCCAGGGATGCTCCCAGGTGGGT  
PGC clone 13 CCCTCCCTCCTGCAGCACCTCGTCCCCATCTCCACCTCCAGGGATGCTCCCAGGTGGGT  
\*\*\*\*\*

NCBI chicken TCCCCCTCCTGGTTTCCGACTGGGGTGGGAAGCACAGGCGACAGACACGTGTCTTTGCAT  
CB TCCCCCTCCTGGTTTCCGACTGGGGTGGGAAGCACAGGCGACAGACACGTGTCTTTGCAT  
PGC clone 13 TCCCCCTCCTGGTTTCCGACTGGGGTGGGAAGCACAGGCGACAGACACGTGTCTTTGCAT  
\*\*\*\*\*

NCBI chicken ACTGACGGCTCAATCCATCCATCTGCTCATTTGTTCCCTTGAGAGATGTAGGGCTGATTTCT  
CB ACTGACGGCTCAATCCATCCATCTGCTCATTTGTTCCCTTGAGAGATGTAGGGCTGATTTCT  
PGC clone 13 ACTGACGGCTCAATCCATCCATCTGCTCATTTGTTCCCTTGAGAGATGTAGGGCTGATTTCT  
\*\*\*\*\*

NCBI chicken TGTGTCCCCGTGCCTCAGTTTCCCCACTCGCAGGACCCACCCAGCACTGCAGCCGAGCA  
CB TGTGTCCCCGTGCCTCAGTTTCCCCACTCGCAGGACCCACCCAGCACTGCAGCCGAGC-  
PGC clone 13 TGTGTCCCCGTGCCTCAGTTTCCCCACTCGCAGGACCCACCCAGCACTGCAGCCGAGC-  
\*\*\*\*\*

NCBI chicken GAGAACTCTGTGCTCCCCT  
CB -----  
PGC clone 13 -----

**OFF-TARGET 7**

NCBI chicken **CAGACGTTTACCCGGACACA**AAACGAGGGGTTCCGTATTTCTCGCTTCAATACCATCTA  
CB -----ATACCATCTA  
PGC clone 13 -----ATACCATCTA  
\*\*\*\*\*

NCBI chicken CAGCTCAGAGCCCATTGCGCCTCTCCATTGCGCACCCCTCTGCGGTAGCACTGATGGAGC  
CB CAGCTCAGAGCCCATTGCGCCTCTCCATTGCGCACCCCTCTGCGGTAGCACTGATGGAGC  
PGC clone 13 CAGCTCAGAGCCCATTGCGCCTCTCCATTGCGCACCCCTCTGCGGTAGCACTGATGGAGC  
\*\*\*\*\*

|                                    |                                                                                                                                                                                                                                                 |
|------------------------------------|-------------------------------------------------------------------------------------------------------------------------------------------------------------------------------------------------------------------------------------------------|
| NCBI chicken<br>CB<br>PGC clone 13 | AGAAAGCACCAGGAAGCGCCACAGCCCCCTCTCCACAGCCAAGGACAGACCTTGTGGCCC<br>AGAAAGCACCAGGAAGCGCCACAGCCCCCTCTCCACAGCCAAGGACAGACCTTGTGGCCC<br>AGAAAGCACCAGGAAGCGCCACAGCCCCCTCTCCACAGCCAAGGACAGACCTTGTGGCCC<br>*****                                           |
| NCBI chicken<br>CB<br>PGC clone 13 | TTACAGGATCCGTTGGCACTGACACGGGTCCAATT <b>CCCACCTGGGAGCTGCGATGAGG</b> AT<br>TTACAGGATCCGTTGGCACTGACACGGGTCCAATTCCCACCTGGGAGCTGCGATGAGGAT<br>TTACAGGATCCGTTGGCACTGACACGGGTCCAATTCCCACCTGGGAGCTGCGATGAGGAT<br>*****                                  |
| NCBI chicken<br>CB<br>PGC clone 13 | CCCATGGGATGCTGGAGCCTGCAGAGCCCTGCAGCTGCAGGCTGGCTTCCGGGCTTCACC<br>CCCATGGGATGCTGGAGCCTGCAGAGCCCTGCAGCTGCAGGCTGGCTTCCGGGCTTCACC<br>CCCATGGGATGCTGGAGCCTGCAGAGCCCTGCAGCTGCAGGCTGGCTTCCGGGCTTCACC<br>*****                                           |
| NCBI chicken<br>CB<br>PGC clone 13 | CTCCTCACGCTGTACAGCCGTCCGCTTCCTTCCTCCTTCCTTTCCTCTTTCTCTTTTTC<br>CTCCTCACGCTGTACAGCCGTCCGCTTCCTTCCTCCTTCCTTTCCTCTTTCTCTTTTTC<br>CTCCTCACGCTGTACAGCCGTCCGCTTCCTTCCTCCTTCCTTTCCTCTTTCTCTTTTTC<br>*****                                              |
| NCBI chicken<br>CB<br>PGC clone 13 | CTCTTTTTTTTTTTTTTTTTTAAACAGATCTGAACATCTTTTCTCTGCTTTGCACACAACC<br>CTCTTTTTTTTTTTTTTTTTTAAACAGATCTGAACATCTTTTCCCGGTTTTGCACACAACC<br>CTCTTTTTTTTTTTTTTTTTTAAACAGATCTGAACATCTTTTCCCGGTTTTGCACACAACC<br>***** ** * * * * * * * * * * * * * * * * * * |
| NCBI chicken<br>CB<br>PGC clone 13 | CAGGAGCGGCTCCAGGAGGGACAGAGCCCATTCCCACTGGTTTGGT<br>CAGGASGGGCCCCGGGAGGAAAAA-----<br>CRGGAGGGGCCCCGGGGGGAAAAA-----<br>* * * * * * * * * * * * * * * * * *                                                                                         |

**OFF-TARGET 8**

|                                    |                                                                                                                                                                                                            |
|------------------------------------|------------------------------------------------------------------------------------------------------------------------------------------------------------------------------------------------------------|
| NCBI chicken<br>CB<br>PGC clone 13 | <b>GGCCAAACTGTGCAAGAG</b> CAGGACATGTCGATCTGACCTGCTGATCAAGGGCCAGATT<br>-----AGGGCCAGATT<br>-----GCCAGATT<br>*****                                                                                           |
| NCBI chicken<br>CB<br>PGC clone 13 | AAACCAAAAATTCTGAAATTAATAATGTGCAAAAGTGATGAAATTAGAATTTGCCAACCG<br>AAACCAAAAATTCTGAAATTAATAATGTGCAAAAGTGATGAAATTAGAATTTGCCAACCG<br>AAACCAAAAATTCTGAAATTAATAATGTGCAAAAGTGATGAAATTAGAATTTGCCAACCG<br>*****      |
| NCBI chicken<br>CB<br>PGC clone 13 | CTTCATTAATTTCTTAACGTTGGCAATAATGAGACGTAATTGCTGGCTCGAAAC <b>TCCCG</b><br>CTTCATTAATTTCTTAACGTTGGCAATAATGAGACGTAATTGCTGGCTCGAAACTCCCC<br>CTTCATTAATTTCTTAACGTTGGCAATAATGAGACGTAATTGCTGGCTCGAAACTCCCC<br>***** |
| NCBI chicken<br>CB<br>PGC clone 13 | <b>AGCCTGCTCCAGGTAGG</b> AAGATGAATGTGTCCCTCCCCACTGTGGTTTGCACTGATCGT<br>AGCCTGCTCCAGGTAGGAAGATGAATGTGTCCCTCCCCACTGTGGTTTGCACTGATCGT<br>AGCCTGCTCCAGGTAGGAAGATGAATGTGTCCCTCCCCACTGTGGTTTGCACTGATCGT<br>***** |
| NCBI chicken<br>CB<br>PGC clone 13 | TCTGGTTTTCTGCTTCTTTGTGCCCTTTGATGTTCAAGTGCTTTTGGGCAGCCCTGTAG<br>TCTGGTTTTCTGCTTCTTTGTGCCCTTTGATGTTCAAGTGCTTTTGGGCAGCCCTGTAG<br>TCTGGTTTTCTGCTTCTTTGTGCCCTTTGATGTTCAAGTGCTTTTGGGCAGCCCTGTAG<br>*****         |
| NCBI chicken<br>CB                 | CATCCAGCTTCCTGTGCAGCAGTGGGGCAGTTGGTGCAGCCAAGGTAACCAAAATCAAAGG<br>CATCCAGCTTCCTGTGCAGCAGTGGGGCAGTTGGTGCAGCCAAGGTAACCAAAATCAAAGG                                                                             |

PGC clone 13      CATCCAGCTCCTGTGCAGCAGTGGGGCAGTTGGTGCAGCCAAGGTAACCAAATCAAAGG  
\*\*\*\*\*

NCBI chicken      AATTTCTTAGGGAGAAAGACAGGGAAAAATGGTCAGGTTGCTGCAGAAA  
CB                    AATTTCTTAGGGAGAAAGACAGGGAAAAA-----  
PGC clone 13      AATTTCTTAGGGAGAAAGACAGGGAAAAA-----  
\*\*\*\*\*
